# Supplementary material for: Piezoresistive behavior of a stretchable carbon nanotube-interlayered poly(dimethylsiloxane) sheet with a wrinkled structure
Source: Royal Society of Chemistry journal article supplement (doi:10.1039/c5ra12928a), 2015-01-01
Supplement: c5ra12928a1.pdf [file c5ra12928a1.pdf]

## Supporting Information

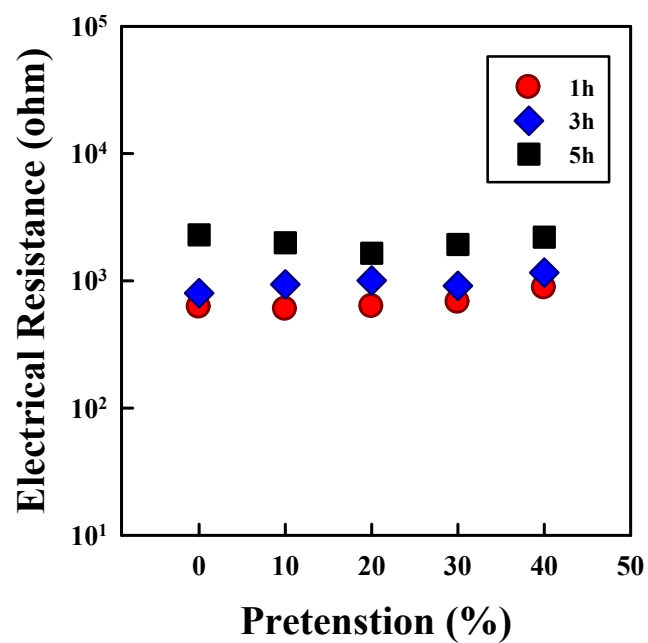

**Figure S1.** Electrical resistance of samples without elongation for various sonication times.

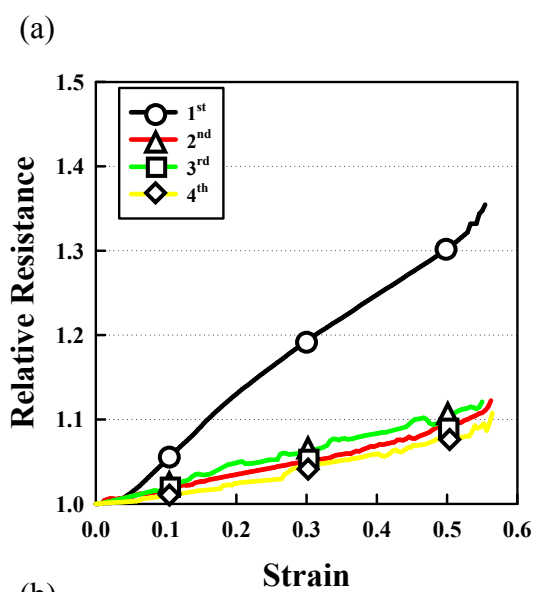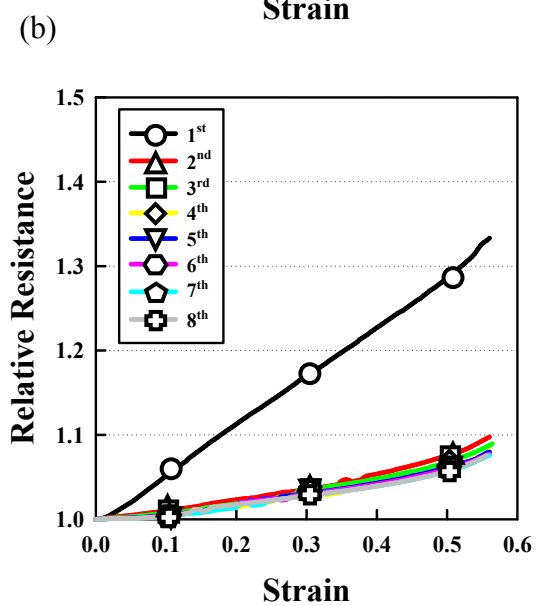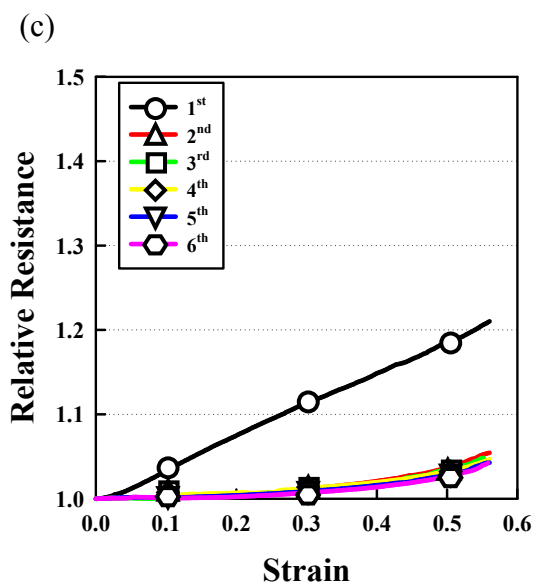

Figure S2. Repeatability test for 1 h-sonicated CNT-interlayered PDMS.

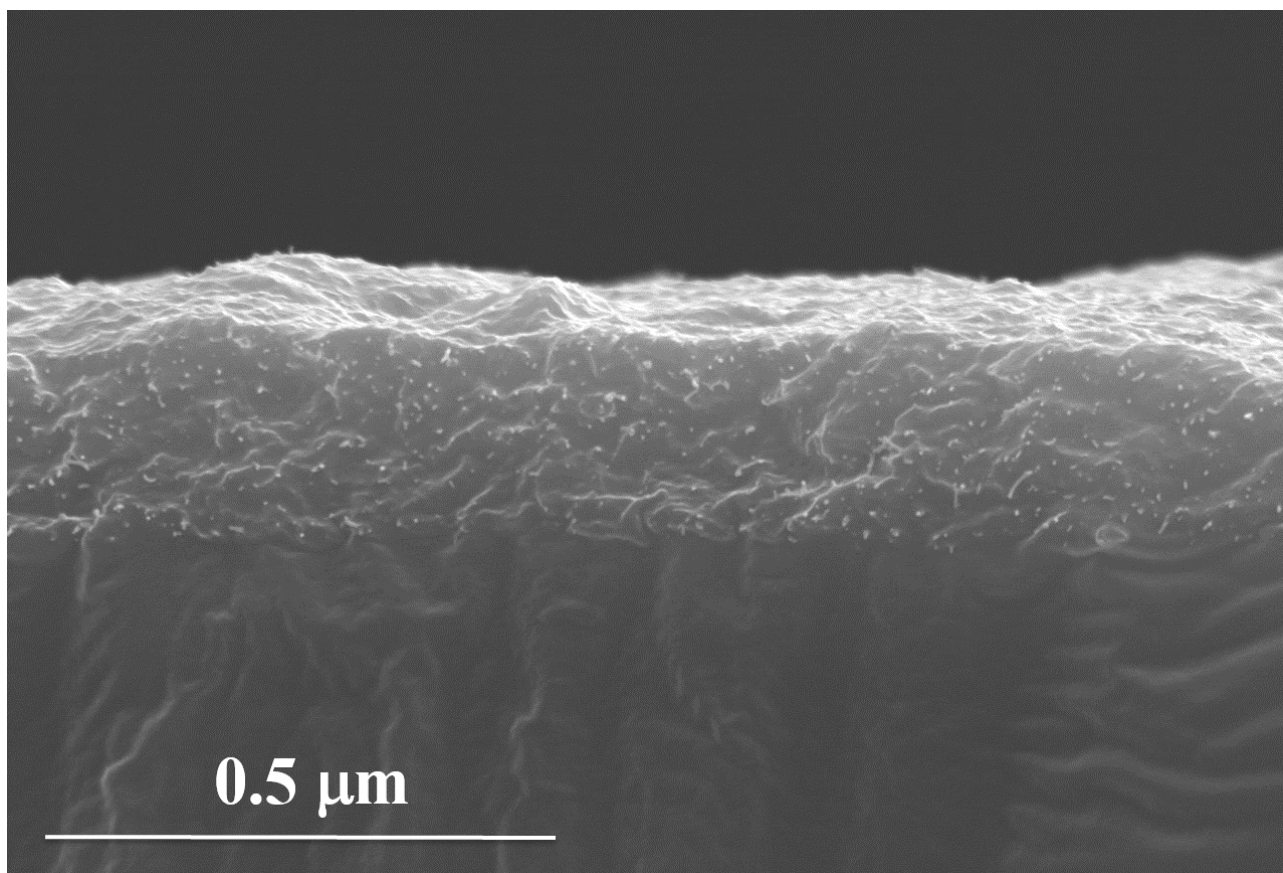

**Figure S3.** SEM images of higher magnification at the point of contact of the CNT film with the PDMS sheet

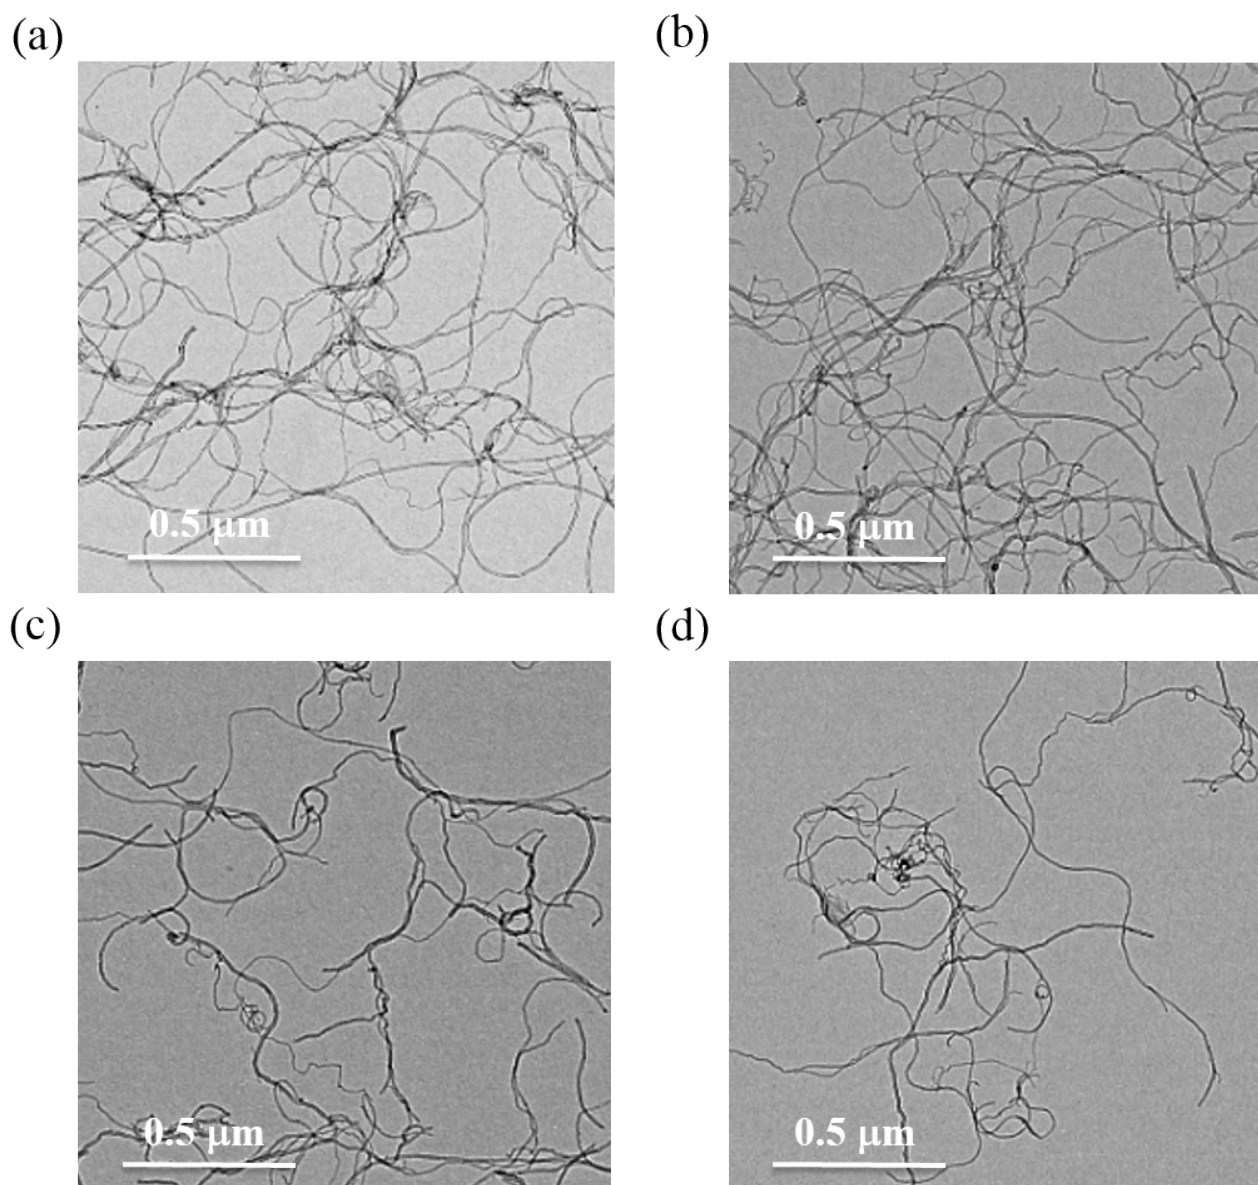

**Figure S4.** TEM images of CNTs after sonication for (a) 0h, (b) 1h, (c) 3h, and (d) 5h
